# Supplementary material for: Understanding the Impact of Literacy on Knowledge Gap and Behaviour Pattern among Diabetic Patients: A Cross-Sectional Study
Source: Research Square preprint supplement (doi:10.21203/rs.3.rs-4864039/v1), 2024-09-16
Supplement: Supplementary file 1 [file 4b3469907a22e34869537f62.docx]

**Table: 1** Association of knowledge, attitude, and practice scores among the patients stratified by their demographic and clinical variables

|  | **Variables** | **Total n (%)** | **Knowledge scores** | | | **p-value** | **Attitude scores** | | |  | **Practice scores** | | |  |
| --- | --- | --- | --- | --- | --- | --- | --- | --- | --- | --- | --- | --- | --- | --- |
|  | **Poor n (%)** | **Fair n (%)** | **Good n (%)** |  | **Poor n (%)** | **Fair n (%)** | **Good n(%)** | **p-value** | **Poor n(%)** | **Fair n (%)** | **Good n (%)** | **p-value** |
| Weight | 41-50 | 16 (3.2) | 7 (43.8) | 5 (31.3) | 4 (25) | 0.008 | 8 (50) | 4 (25) | 4 (25) | 0.004 | 10 (62.5) | 3 (18.8) | 3 (18.8) | 0.058 |
| 51-60 | 50  (10) | 12 (24) | 23 (46.0) | 15 (30) | 22 (44) | 5 (10) | 23 (46) | 12 (24) | 26 (52) | 12 (24) |
| 61-70 | 123  (24.6) | 57 (46.3) | 37 (30.1) | 29 (23.6) | 50 (40.7) | 30 (24.4) | 43 (35) | 44 (35.8) | 60 (48.8) | 19 (15.4) |
| 71-80 | 176 (35.2) | 44 (25) | 71 (40.3) | 61 (34.7) | 52 (29.5) | 29 (16.5) | 95 (54) | 47 (26.7) | 98 (55.7) | 31 (17.6) |
| 81-90 | 117  (23.4) | 40 (34.2) | 48 (41.0) | 29 (24.8) | 47 (40.2) | 19 (16.2) | 51(43.6) | 37 (31.6) | 61 (52.1) | 19 (16.2) |
| 91-100 | 16  (3.2) | 2 (12.5) | 9 (56.3) | 5(31.3) | 8 (50) | 1 (6.3) | 7 (43.8) | 3 (18.8) | 8 (50) | 5 (31.3) |
| >101 | 2 (0.4) | 2 (100) | 0 | 0 | 0 | 2 (100) | 0 | 2 (100) | 0 | 0 |
| Age | 31-40 | 18  (3.6) | 4 (22.2) | 6 (33.3) | 8 (44.4) | 0.060 | 5 (27.8) | 1 (5.6) | 12 (66.7) | 0.007 | 14 (77.8) | 3 (16.7) | 1 (5.6) | <0.001 |
| 41-50 | 102  (20.4) | 31 (30.4) | 34 (33.3) | 37 (36.3) | 27 (26.5) | 19 (18.6) | 56 (54.9) | 51 (50) | 34 (33.3) | 17 (16.7) |
| 51-60 | 170  (34) | 45 (26.5) | 75 (44.1) | 50 (29.4) | 60 (35.3) | 28 (16.5) | 82 (48.2) | 38 (22.4) | 100 (58.8) | 32 (18.8) |
| 61-70 | 131  (26.2) | 48 (36.6) | 51 (38.9) | 32 (24.4) | 57 (43.5) | 22 (16.8) | 52 (39.7) | 31 (23.7) | 75 (57.3) | 25 (19.1) |
| 71-80 | 63  (12.6) | 30 (47.6) | 22 (34.9) | 11 (17.5) | 31 (49.2) | 17 (27) | 15 (23.8) | 17 (27) | 35 (55.6) | 11 (17.5) |
| 81-90 | 16  (3.2) | 6 (37.5) | 5 (31.3) | 5 (31.3) | 7 (43.8) | 3 (18.8) | 6 (37.5) | 4 (25) | 9 (56.3) | 3 (18.8) |
| Gender | Female | 197  (39.4) | 67 (34.0) | 89 (45.2) | 41 (20.8) | 0.005 | 99 (50.3) | 27 (13.7) | 71 (36.0) | <0.001 | 61 (31) | 85 (43.1) | 51 (25.9) | <0.001 |
| Male | 303  (60.6) | 97 (32.0) | 104 (34.3) | 102 (33.7) | 88 (29) | 63 (20.8) | 152 (50.2) | 94 (31) | 171 (56.4) | 38 (12.5) |
| Marital status | Married | 396  (79.2) | 120 (30.3) | 148 (37.4) | 128 (32.3) | <0.001 | 116 (29.3) | 78 (19.7) | 202 (51.0) | <0.001 | 115 (29) | 212 (53.5) | 69 (17.4) | 0.001 |
| Unmarried | 30  (6) | 8 (26.7) | 18 (60.0) | 4 (13.3) | 18 (60) | 3 (10) | 9 (30) | 6 (20) | 11 (36.7) | 13 (43.3) |
| Divorced | 17  (3.4) | 6 (35.3) | 10 (58.8) | 1 (5.9) | 12 (70.6) | 3 (17.6) | 2 (11.8) | 9 (52.9) | 7 (41.2) | 1 (5.9) |
| Widowed | 57  (11.4) | 30 (52.6) | 17 (29.8) | 10 (17.5) | 41 (71.9) | 6 (10.5) | 10 (17.5) | 25 (43.9) | 26 (45.6) | 6 (10.5) |
| Education Status | Illiterate | 161  (32.2) | 90 (55.9) | 59 (36.6) | 12 (7.5) | <0.001 | 91 (56.5) | 37 (23) | 33 (20.5) | <0.001 | 70 (43.5) | 81 (50.3) | 10 (6.2) | <0.001 |
| Primary | 20  (4) | 1 (5.0) | 16 (80.0) | 3 (15.0) | 19 (95) | 0 | 1 (5) | 6 (30) | 13 (65) | 1 (5) |
| Middle | 95  (19) | 21 (22.1) | 44 (46.3) | 30 (31.6) | 30 (31.6) | 22 (23.2) | 43 (45.3) | 27 (28.4) | 57 (60) | 11 (11.6) |
| Secondary | 110  (22) | 39 (35.5) | 44 (40.0) | 27 (24.5) | 35 (31.8) | 18(16.4) | 57 (51.8) | 26 (23.6) | 51 (46.4) | 33 (30) |
| Degree | 85  (17) | 12 (14.1) | 22 (25.9) | 51 (60.0) | 12 (14.1) | 9 (10.6) | 64 (75.3) | 17 (20) | 40 (47.1) | 28 (32.9) |
| Masters | 29  (5.8) | 1 (3.4) | 8 (27.6) | 20 (69.0) | 0 | 4 (13.8) | 25 (86.2) | 9 (31) | 14 (48.3) | 6 (20.7) |
| Occupa-tion of patient | Working | 220  (44) | 51 (23.2) | 67 (30.5) | 102 (46.4) | <0.001 | 39 (17.7) | 36 (16.4) | 145 (65.9) | <0.001 | 60 (27.3) | 115 (52.3) | 45 (20.5) | 0.012 |
| Unemployed | 110  (22) | 50 (45.5) | 48 (43.6) | 12 (10.9) | 59 (53.6) | 28 (25.5) | 23 (20.9) | 32 (29.1) | 67 (60.9) | 11 (10) |
| House wife | 106  (21.2) | 45 (42.5) | 53 (50.0) | 8 (7.5) | 71 (67) | 15 (14.2) | 20 (18.9) | 40 (37.7) | 50 (47.2) | 16 (15.1) |
| Retired | 52  (10.4) | 18 (34.6) | 13 (25.0) | 21 (40.4) | 18 (34.6) | 9 (17.3) | 25 (48.1) | 17 (32.7) | 19 (36.5) | 16 (30.8) |
| Others | 12  (2.4) | 0 | 12 (100) | 0 | 0 | 2 (16.7) | 10 (83.3) | 6 (50) | 5 (41.7) | 1 (8.3) |
| Health insurance | Yes | 254  (50.8) | 52 (20.5) | 98 (38.6) | 104 (40.9) | <0.001 | 71 (28.0) | 36 (14.2) | 147 (57.9) | <0.001 | 59 (23.2) | 136 (53.5) | 59 (23.2) | <0.001 |
| No | 246  (49.2) | 112 (45.5) | 95 (38.6) | 39 (15.9) | 116 (47.2) | 54 (22) | 76 (30.9) | 96 (39) | 120 (48.8) | 30 (12.2) |
| Family history | Yes | 204  (40.8) | 42 (20.6) | 85 (41.7) | 77 (37.7) | <0.001 | 68 (33.3) | 32 (15.7) | 104 (51) | 0.006 | 51 (25) | 115 (56.4) | 38 (18.6) | 0.022 |
| No | 274  (54.8) | 120 (43.8) | 91 (33.2) | 63 (23.0) | 105 (38.3) | 58(21.2) | 111 (40.5) | 101 (36.9) | 128 (46.7) | 45 (16.4) |
| Don’t know | 22  (4.4) | 2 (9.1) | 17 (77.3) | 3 (13.6) | 14 (63.6) | 0 | 8 (36.4) | 3 (13.6) | 13 (59.1) | 6 (27.3) |
| Patient history | Recently diagnosed | 158  (31.6) | 50 (31.6) | 67 (42.4) | 41 (25.9) | 0.026 | 41 (25.9) | 29 (18.4) | 88 (55.7) | 0.001 | 60 (38) | 67 (42.4) | 31 (19.6) | <0.001 |
| 5 years | 164  (32.8) | 53 (32.3) | 74 (45.1) | 37 (22.6) | 80(48.8) | 21 (12.8) | 63 (38.4) | 46 (28) | 102 (62.2) | 16 (9.8) |
| 10 years | 83  (16.6) | 32 (38.6) | 22 (26.5) | 29 (34.9) | 30 (36.1) | 21 (25.3) | 32 (38.6) | 15 (18.1) | 47 (56.6) | 21 (25.3) |
| More than 10 years | 95  (19) | 29 (30.5) | 30 (31.6 | 36 (37.9) | 36 (37.9) | 19 (20) | 40 (42.1) | 34 (35.8) | 40 (42.1) | 21 (22.1) |
| Blood sugar: FSL | <79-140 mg/dl | 15  (3) | 0 | 13 (86.7) | 2 (13.3) | <0.001 | 3 (20) | 3 (20) | 9 (60) | 0.064 | 5 (33.3) | 7 (46.7) | 3 (20) | 0.004 |
| 141-170 mg/dl | 99  (19.8) | 23 (23.2) | 49 (49.5) | 27 (27.3) | 41 (41.4) | 14 (14.1) | 44 (44.4) | 25 (25.3) | 49 (49.5) | 25 (25.3) |
| 171-200 mg/dl | 160  (32) | 60 (37.5) | 55 (34.4) | 45 (28.1) | 55 (34.4) | 33 (20.6) | 72 (45) | 42 (26.3) | 89 (55.6) | 29 (18.1) |
| 201-230 mg/dl | 102  (20.4) | 18 (17.6) | 43 (42.2) | 41 (40.2) | 44 (43.1) | 11 (10.8) | 47 (46.1) | 31 (30.4) | 52 (51.) | 19 (18.6) |
| 231-260 mg/dl | 76  (15.2) | 30 (39.5) | 28 (36.8) | 18 (23.7) | 28 (36.8) | 15 (19.7) | 33 (43.4) | 33 (43.4) | 35 (46.1) | 8 (10.5) |
| 261-290 mg/dl | 41  (8.2) | 29 (70.7) | 4 (9.8) | 8 (19.5) | 16 (39) | 13 (31.7) | 12 (29.3) | 16 (39) | 24 (58.5) | 1 (2.4) |
| >290 mg/dl | 7  (1.4) | 4 (57.1) | 1 (14.3) | 2 (28.6) | 0 | 1 (14.3) | 6 (85.7) | 3 (42.9) | 0 | 4 (57.1) |
| Blood sugar: RBS | 201-230 mg/dl | 34  (6.8) | 10 (29.4) | 20 (58.8) | 4 (11.8) | <0.001 | 13 (38.2) | 9 (26.5) | 12 (35.3) | 0.885 | 13 (38.2) | 17 (50) | 4 (11.8) | 0.024 |
| 231-260 mg/dl | 42  (8.4) | 9 (21.4) | 31 (73.8) | 2 (4.8) | 16 (38.1) | 8 (19) | 18 (42.9) | 9 (21.4) | 28 (66.7) | 5 (11.9) |
| 261-290 mg/dl | 143  (28.6) | 47 (32.9) | 51 (35.7) | 45 (31.5) | 54 (37.8) | 24 (16.8) | 65 (45.5) | 41 (28.7) | 64 (44.8) | 38 (26.6) |
| >290 mg/dl | 281  (56.2) | 98 (34.9) | 91 (32.4) | 92 (32.7) | 104 (37) | 49 (17.4) | 128 (45.6) | 92 (32.7) | 147 (52.3) | 42 (14.9) |
| Blood sugar: HbA1c | Below 42 mmol/mol (6.0) | 2  (0.4) | 1 (50.0) | 1 (50.0) | 0 | <0.001 | 1 (50) | 0 | 1 (50) | 0.408 | 0 | 2 (100) | 0 | 0.689 |
| 42 to 47 mmol/mol (6.0 to 6.4) | 91  (18.2) | 12(13.2) | 63 (69.2) | 16 (17.6) | 40 (44) | 11 (12.1) | 40 (44) | 26 (28.6) | 48 (52.7) | 17 (18.7) |
| 48 mmol/mol (6.5 or ever) | 407  (81.4) | 151 (37.1) | 129 (31.7) | 127 (31.2) | 146 (35.9) | 79 (19.4) | 182 (44.7) | 129 (31.7) | 206 (50.6) | 72 (17.7) |
| Diabetes clinic visit | Every 3 months | 183  (36.6) | 57 (31.1) | 39 (21.3) | 87 (47.5) | <0.001 | 47 (25.7) | 33 (18) | 103 (56.3) | <0.001 | 47 (25.7) | 86 (47) | 50 (27.3) | <0.001 |
| Every 6 months | 167  (33.4) | 55 (32.9) | 77 (46.1) | 35 (21.0) | 84(50.3) | 30 (18) | 53 (31.7) | 66(39.5) | 86 (51.5) | 15 (9) |
| Once a year | 82  (16.4) | 30 (36.6) | 39 (47.6) | 13 (15.9) | 39(47.6) | 14 (17.1) | 29 (35.4) | 17 (20.7) | 51 (62.2) | 14 (17.1) |
| First time | 68  (13.6) | 22 (32.4) | 38 (55.9) | 8 (11.8) | 17 (25) | 13 (19.1) | 38 (55.9) | 25 (36.8) | 33 (48.5) | 10 (14.7) |
| Physical activity | Mild | 198  (39.6) | 80 (40.4) | 75 (37.9) | 43 (21.7) | <0.001 | 91(46) | 39 (19.7) | 68 (34.3) | <0.001 | 74 (37.4) | 88 (44.4) | 36 (18.2) | 0.020 |
| Moderate | 166  (33.2) | 58 (34.9) | 68 (41.0) | 40 (24.1) | 63 (38) | 31 (18.7) | 72 (43.4) | 43 (25.9) | 100 (60.2) | 23 (13.9) |
| High | 136(27.2) | 26 (19.1) | 50 (36.8) | 60 (44.1) | 33 (24.3) | 20 (14.7) | 83 (61) | 38 (27.9) | 68 (50) | 30 (22.1) |

**Table: 2 Summary of Knowledge score of DMII patients participated in this study stratified by education status, n = 500**

| **Variables** | | **Illiterate n(%)** | **Primary n(%)** | **Middle n(%)** | **Secondary n(%)** | **Degree n(%)** | **Masters n(%)** | **p-value** |
| --- | --- | --- | --- | --- | --- | --- | --- | --- |
| What is diabetes? | Is a raised blood sugar only | 59 (37.3) | 5(25) | 52(55.3) | 66(61.1) | 68(81.9) | 29(100) | 0.001 |
|
| Is a disease which affects any part of the body | 21(13.3) | 2(10) | 10(10.6) | 18(16.7) | 10(12) | 0 |
| I don't know | 78(49.4) | 13(65) | 32(34) | 24(22.2) | 5(6) | 0 |
| Identify life style risk factors for DMII | Eating too much | 46(28.6) | 3(15) | 36(37.9) | 39(35.5) | 50(58.8) | 19(65.5) | 0.001 |
| Smoking | 31(19.3) | 2(10) | 40(42.1) | 45(40.9) | 40(47.1) | 12(41.4) | 0.001 |
| Alcohol | 68(42.2) | 12(60) | 58(61.1) | 61(55.5) | 56(65.9) | 14(48.3) | 0.006 |
| Lack of exercise | 65(40.4) | 15(75) | 55(57.9) | 61(55.5) | 64(75.3) | 21(72.4) | 0.001 |
| Eating too much fat and sugar | 99(61.5) | 16(80) | 71(74.7) | 71(64.5) | 64(75.3) | 21(72.4) | 0.094 |
| What are treatment (management) options of DM | Insulin therapy | 49(30.4) | 2(10.) | 25(26.3) | 48(43.6) | 40(47.1) | 18(62.1) | 0.001 |
| Regular BS monitoring | 19(11.8) | 2(10) | 38(40) | 37(33.6) | 68(80) | 24(82.8) | 0.001 |
| Bariatric surgery and weight reduction | 13(8.1) | 2(10) | 26(27.4) | 27(24.5) | 43(50.6) | 15(51.7) | 0.001 |
| Dietary management | 55(34.2) | 2(10) | 53(55.8) | 54(49.1) | 74(87.1) | 26(89.7) | 0.001 |
| Orally taken tablets | 126(78.3) | 2(10.) | 81(85.3) | 91(82.7) | 73(85.9) | 26(89.7) | 0.001 |
| Exercise | 20(12.4) | 2(10) | 68(71.6) | 60(54.5) | 72(84.7) | 24(82.8) | 0.001 |
| Symptom of type II diabetes mellitus (DM II) or poorly controlled type II diabetes mellitus. (K4) | Tiredness | 85(52.8) | 19(95) | 70(73.7) | 78(70.9) | 72(84.7) | 27(93.1) | 0.001 |
| Weight loss | 59(36.6) | 7(35) | 36(37.9) | 43(39.1) | 49(57.6) | 17(58.6) | 0.01 |
| Passing lots of urine | 97(60.2) | 20(100) | 72(75.8) | 85(77.3) | 72(84.7) | 25(86.2) | 0.001 |
| Loss of appetite | 68(42.2) | 12(60) | 54(56.8) | 49(44.5) | 57(67.1) | 18(62.1) | 0.002 |
| Complications of type II diabetes mellitus, if not treated. (K5) | Sexual dysfunction | 11(6.8) | 2(10) | 9(9.5) | 9(8.2) | 25(29.4) | 9(31) | 0.001 |
| Kidney failure | 37(23) | 5(25) | 41(43.2) | 46(41.8) | 46(54.1) | 17(58.6) | 0.001 |
| Neurologic numbness | 34(21.1) | 7(35) | 33(34.7) | 34(30.9) | 38(44.7) | 17(58.6) | 0.001 |
| Burning sensation | 66(41) | 14(70) | 54(56.8) | 48(43.6) | 54(63.5) | 20(69) | 0.001 |
| Brain disease like Stroke | 26(16.1) | 1(5) | 25(26.3) | 25(22.7) | 33(38.8) | 13(44.8) | 0.001 |
| Low blood sugar associated with dizziness, nausea and tremors | 26(16.1) | 6(30) | 34(35.8) | 14(12.7) | 30(35.3) | 8(27.6) | 0.001 |
| Eye problem or even blindness | 23(14.3) | 7(35) | 38(40) | 32(29.1) | 49(57.6) | 19(65.5) | 0.001 |
| Amputation of limb | 36(22.4) | 6(30) | 35(36.8) | 33(30) | 45(52.9) | 15(51.7) | 0.001 |
| Heart complications | 101(62.7) | 20(100) | 77(81.1) | 59(53.6) | 68(80) | 23(79.3) | 0.001 |
| Health risk factors for DMII mellitus. (K6) | Hypertension | 70(43.5) | 7(35) | 53(55.8) | 51(46.4) | 57(67.1) | 23(79.3) | 0.001 |
| Hyper-lipidemia | 50(31.1) | 7(35) | 41(43.2) | 44(40) | 55(64.7) | 22(75.9) | 0.001 |
| Family history | 40(24.8) | 11(55) | 56(58.9) | 56(50.9) | 57(67.1) | 22(75.9) | 0.001 |
| Obesity | 62(38.5) | 15(75) | 54(56.8) | 58(52.7) | 58(68.2) | 20(69) | 0.001 |
| Life style modification. (K7) | Exercise | 16(9.9) | 20(100) | 66(69.5) | 31(28.2) | 41(48.2) | 23(79.3) | 0.001 |
| Dietary modification | 90(55.9) | 20(100) | 35(36.8) | 72(65.5) | 69(81.2) | 23(79.3) | 0.001 |
| Weight reduction | 36(22.4) | 1(5) | 65(68.4) | 33(30) | 68(80) | 24(82.8) | 0.001 |
| Control of your blood glucose levels is an important for reducing complication of DMII mellitus ? (K8) | Yes | 100(63.7) | 15(75) | 76(80) | 71(65.7) | 68(81.9) | 24(82.8) | 0.006 |
| No | 57(36.3) | 5(25) | 19(20) | 37(34.3) | 15(18.1) | 5(17.2) |
| HBA1C is a measure of your average blood glucose level for the past. (K9) | Day | 1(0.6) | 0 | 2(2.1) | 4(3.7) | 0 | 0 | 0.001 |
| Week | 38(23.8) | 1(5) | 11(11.6) | 10(9.2) | 9(10.8) | 3(10.3) |
| 6-12 weeks | 37(23.1) | 9(45) | 45(47.4) | 52(47.7) | 54(65.1) | 18(62.1) |
| 6 months | 84(52.5) | 10(50) | 37(38.9) | 43(39.4) | 20(24.1) | 8(27.6) |
| Which is the best method for home glucose testing? (K10) | Urine testing | 28(17.8) | 0 | 4(4.2) | 15(13.6) | 16(18.8) | 0 | 0.001 |
| Blood testing | 70(44.6) | 18(90) | 70(73.7) | 61(55.5) | 54(63.5) | 23(79.3) |
| Both are equally good | 59(37.6) | 2(10) | 21(22.1) | 34(30.9) | 15(17.6) | 6(20.7) |
| What effect will an infection most likely have on blood glucose? (K11) | Lowers it | 20(12.6) | 1(5) | 11(11.6) | 9(8.3) | 23(27.1) | 12(41.4) | 0.001 |
| Raises it | 38(23.9) | 7(35) | 50(52.6) | 45(41.3) | 44(51.8) | 15(51.7) |
| Has no effect | 101(63.5) | 12(60) | 34(35.8) | 55(50.5) | 18(21.2) | 2(6.9) |
| The best way to take care of your feet is to (K12) | Look at and wash them each day and keep them dry | 45(28) | 10(50) | 50(52.6) | 61(55.5) | 60(70.6) | 20(69) | 0.001 |
| Massage them with alcohol each day | 27(16.8) | 3(15) | 9(9.5) | 8(7.3) | 6(7.1) | 1(3.4) |
| Soak them for one hour each day | 17(10.6) | 2(10) | 8(8.4) | 7(6.4) | 8(9.4) | 1(3.4) |
| Buy shoes a size larger than usual | 28(17.4) | 5(25) | 17(17.9) | 12(10.9) | 3(3.5) | 1(3.4) |
| Don't know | 44(27.3) | 0 | 11(11.6) | 22(20) | 8(9.4) | 6(20.7) |
| Numbness and tingling may be symptoms of: (K13) | Nerve disease | 24(14.9) | 2(10) | 38(40.9) | 28(25.9) | 47(55.3) | 21(72.4) | 0.001 |
| Kidney disease | 11(6.8) | 6(30) | 17(18.3) | 40(37) | 10(11.8) | 0 |
| Eye disease | 13(8.1) | 6(30) | 5(5.4) | 7(6.5) | 5(5.9) | 1(3.4) |
| Liver disease | 13(8.1) | 0 | 5(5.4) | 7(6.5) | 13(15.3) | 5(17.2) |
| Don't know | 100(62.1) | 6(30) | 28(30.1) | 26(24.1) | 10(11.8) | 2(6.9) |
| Which of the following is usually not associated with DMII mellitus? (K14) | Vision problems | 5(3.1) | 0 | 8(8.4) | 1(0.9) | 12(14.1) | 11(37.9) | 0.001 |
| Kidney problems | 9(5.6) | 6(30) | 3(3.2) | 8(7.5) | 3(3.5) | 3(10.3) |
| Nerve problems | 21(13) | 6(30) | 22(23.2) | 44(41.1) | 10(11.8) | 1(3.4) |
| Lung problems | 19(11.8) | 2(10) | 30(31.6) | 20(18.7) | 52(61.2) | 13(44.8) |
| Don't know | 107(66.5) | 6(30) | 32(33.7) | 34(31.8) | 8(9.4) | 1(3.4) |

**Table: 3 Summary of Attitude score of DM II patients participated in this study stratified by education status, n = 500**

| **Variables** | | **Illiterate** | **Primary** | **Middle** | **Secondary** | **Degree** | **Masters** | **p-value** |
| --- | --- | --- | --- | --- | --- | --- | --- | --- |
| You should be followed regularly and examined for having DMII (A1) | Strongly disagree | 42(26.4) | 4(21.1) | 16(17) | 22(20) | 8(9.6) | 2(6.9) | 0.001 |
| Disagree | 27(17) | 0 | 7(7.4) | 9(8.2) | 4(4.8) | 0 |
| Neutral | 11(6.9) | 3(15.8) | 13(13.8) | 10(9.1) | 3(3.6) | 5(17.2) |
| Agree | 67(42.1) | 10(52.6) | 41(43.6) | 40(36.4) | 33(39.8) | 10(34.5) |
| Strongly agree | 12(7.5) | 2(10.5) | 17(18.1) | 29(26.4) | 35(42.2) | 12(41.4) |
| Family members should be screened for DMII. (A2) | Strongly disagree | 71(44.4) | 11(55) | 27(28.4) | 23(20.9) | 9(10.8) | 0 | 0.001 |
| Disagree | 27(16.9) | 2(10) | 11(11.6) | 24(21.8) | 10(12) | 2(6.9) |
| Neutral | 32(20) | 6(30) | 25(26.3) | 26(23.6) | 7(8.4) | 4(13.8) |
| Agree | 22(13.8) | 0 | 22(23.2) | 20(18.2) | 20(24.1) | 11(37.9) |
| Strongly agree | 8(5) | 1(5) | 10(10.5) | 17(15.5) | 37(44.6) | 12(41.4) |
| Support from family and friends are important in dealing with DMII. (A3) | Strongly disagree | 78(48.8) | 19(95) | 28(29.5) | 28(25.7) | 10(12) | 1(3.4) | 0.001 |
| Disagree | 14(8.8) | 0 | 5(5.3) | 12(11) | 9(10.8) | 1(3.4) |
| Neutral | 14(8.8) | 0 | 11(11.6) | 9(8.3) | 4(4.8) | 3(10.3) |
| Agree | 48(30) | 0 | 33(34.7) | 36(33) | 33(39.8) | 10(34.5) |
| Strongly agree | 6(3.8) | 1(5) | 18(18.9) | 24(22) | 27(32.5) | 14(48.3) |
| You need to cut down consumption of sweets. (A4) | Strongly disagree | 81(51.3) | 19(95) | 24(25.3) | 31(28.2) | 8(9.6) | 1(3.4) | 0.001 |
| Disagree | 14(8.9) | 0 | 6(6.3) | 5(4.5) | 4(4.8) | 2(6.9) |
| Neutral | 17(10.8) | 1(5) | 14(14.7) | 19(17.3) | 6(7.2) | 7(24.1) |
| Agree | 41(25.9) | 0 | 37(38.9) | 34(30.9) | 29(34.9) | 4(13.8) |
| Strongly agree | 5(3.2) | 0 | 14(14.7) | 21(19.1) | 36(43.4) | 15(51.7) |
| Diabetes is not seriously affects the marital relationship. (A5) | Strongly disagree | 15(9.4) | 1(5) | 21(22.1) | 24(21.8) | 26(31.3) | 11(37.9) | 0.001 |
| Disagree | 16(10) | 0 | 18(18.9) | 15(13.6) | 17(20.5) | 8(27.6) |
| Neutral | 14(8.8) | 0 | 6(6.3) | 6(5.5) | 7(8.4) | 6(20.7) |
| Agree | 35(21.9) | 0 | 19(20) | 24(21.8) | 17(20.5) | 2(6.9) |
| Strongly agree | 80(50) | 19(95) | 31(32.6) | 41(37.3) | 16(19.3) | 2(6.9) |
| I don’t think DMII seriously affects daily activities. (A6) | Strongly disagree | 5(3.2) | 1(5) | 9(9.5) | 15(13.6) | 20(24.4) | 14(24.4) | 0.001 |
| Disagree | 23(14.6) | 0 | 20(21.1) | 17(15.5) | 28(34.1) | 11(37.9) |
| Neutral | 13(8.3) | 0 | 14(14.7) | 6(5.5) | 10(12.2) | 1(3.4) |
| Agree | 27(17.2) | 0 | 19(20) | 33(30) | 12(14.6) | 2(6.9) |
| Strongly agree | 89(56.7) | 19(95) | 33(34.7) | 39(35.5) | 12(14.6) | 1(3.4) |
| Physical activity can prevent risk of DMII. (A7) | Strongly disagree | 83(52.5) | 19(95) | 33(34.7) | 34(30.9) | 11(13.3) | 1(3.4) | 0.001 |
| Disagree | 9(5.7) | 0 | 4(4.2) | 13(11.8) | 5(6) | 4(13.8) |
| Neutral | 15(9.5) | 0 | 10(10.5) | 4(3.6) | 1(1.2) | 4(13.8) |
| Agree | 42(26.6) | 0 | 18(18.9) | 27(24.5) | 28(33.7) | 3(10.3) |
| Strongly agree | 9(5.7) | 1(5) | 30(31.6) | 32(29.1) | 38(45.8) | 17(58.6) |
| Maintaining a healthy weight is important in management of DMII. (A8) | Strongly disagree | 74(46.5) | 17(85) | 25(26.6) | 26(23.9) | 11(13.4) | 0 | 0.001 |
| Disagree | 19(11.9) | 0 | 3(3.2) | 5(4.6) | 2(2.4) | 2(6.9) |
| Neutral | 12(7.5) | 2(10) | 6(6.4) | 8(7.3) | 4(4.9) | 7(24.1) |
| Agree | 40(25.2) | 0 | 34(36.2) | 33(30.3) | 26(31.7) | 7(24.1) |
| Strongly agree | 14(8.8) | 1(5) | 26(27.7) | 37(33.9) | 39(47.6) | 13(44.8) |
| DMII complications may be prevented if blood glucose level is well controlled. (A9) | Strongly disagree | 54(34) | 9(45) | 18(19.4) | 26(24.3) | 5(6.1) | 1(3.4) | 0.001 |
| Disagree | 8(5) | 0 | 9(9.7) | 4(3.7) | 2(2.4) | 0 |
| Neutral | 19(11.9) | 2(10) | 8(8.6) | 3(2.8) | 3(3.7) | 3(10.3) |
| Agree | 50(31.4) | 7(35) | 27(29) | 35(32.7) | 21(25.6) | 11(37.9) |
| Strongly agree | 28(17.6) | 2(10) | 31(33.3) | 39(36.4) | 51(62.2) | 14(48.3) |

**Table: 4 Summary of Practice score of DMII patients participated in this study stratified by education status, n = 500**

| **Variables** | | **Illiterate** | **Primary** | **Middle** | **Secondary** | **Degree** | **Masters** | **p-value** |
| --- | --- | --- | --- | --- | --- | --- | --- | --- |
| Do you follow a dietary modification? (P1) | Yes- many times | 41(25.6) | 5(25) | 31(32.6) | 52(47.3) | 48(57.1) | 14(48.3) | 0.001 |
| Yes- occasionally | 87(54.4) | 14(70) | 50(52.6) | 50(45.5) | 34(40.5) | 8(27.6) |
| No, never | 32(20) | 1(5) | 14(14.7) | 8(7.3) | 2(2.4) | 7(24.1) |
| Have you tried to lose weight in the past? (P2) | Yes- many times | 32(20.1) | 6(30) | 28(29.5) | 35(31.8) | 32(37.6) | 9(32.1) | 0.004 |
| Yes- occasionally | 62(39) | 14(70) | 38(40) | 48(43.6) | 31(36.5) | 9(32.1) |
| No, never | 65(40.9) | 0 | 29(30.5) | 27(24.5) | 22(25.9) | 10(35.7) |
| Do you have glucometer? (P3) | Yes | 74(46.5) | 13(65) | 41(43.2) | 71(64.5) | 56(66.7) | 19(65.5) | 0.001 |
| No | 85(53.5) | 7(35) | 54(56.8) | 39(35.5) | 28(33.3) | 10(34.5) |
| Do you check your sugar regularly? (P4) | Yes | 51(31.9) | 12(60) | 45(48.4) | 60(54.5) | 50(58.8) | 17(58.6) | 0.001 |
| No | 109(68.1) | 8(40) | 48(51.6) | 50(45.5) | 35(41.2) | 12(41.4) |
| Do you check your foot regularly? (P5) | Yes | 54(34) | 1(5) | 39(41.1) | 51(46.8) | 38(45.2) | 13(46.4) | 0.008 |
| No | 105(66) | 19(95) | 56(58.9) | 58(53.2) | 46(54.8) | 15(53.6) |

**Table: 5 Relation between knowledge, attitude and practice scores**

| **Relationship between KAP scores** | | | | | | | | | |
| --- | --- | --- | --- | --- | --- | --- | --- | --- | --- |
|  | | | **Poor (scores>15)** | **Fair (scores 15-30)** | | **Good (scores 31-45)** | | **Total** | **p-value** |
| Knowledge scores | Poor (Scores<13) | | 78 (47.6) | 48 (29.3) | | 38 (23.2) | | 164 | 0.001 |
| Fair (Scores 13-26) | | 91 (47.2) | 21 (10.9) | | 81 (42.0) | | 193 |
| Good (Scores 27-40) | | 18 (12.6) | 21 (14.7) | | 104 (72.7) | | 143 |
|  | | | **Practice scores** | | | | | | |
| **Poor (Scores 0-2)** | **Fair (Scores 3-5)** | **Good (Scores 6-7)** | | **Total** | | **p-value** |
| Knowledge scores | | Poor (Scores<13) | 69 (42.1) | 80 (48.8) | 15 (9.1) | | 164 | | 0.001 |
| Fair (Scores 13-26) | 56 (29.) | 102 (52.8) | 35 (18.1) | | 193 | |
| Good (Scores 27-40) | 30 (21) | 74 (51.7) | 39 (27.3) | | 143 | |
|  | | | **Practice scores** | | | | | | |
| **Poor (Scores 0-2)** | **Fair(Scores 3-5)** | **Good (Scores 6-7)** | | **Total** | | **p-value** |
| Attitude scores | | Poor (scores>15) | 63 (33.7) | 99 (52.9) | 25 (13.4) | | 187 | | 0.001 |
| Fair (scores 15-30) | 38 (42.2) | 43 (47.8) | 9 (10) | | 90 | |
| Good (scores 31-45) | 54 (24.2) | 114 (51.1) | 55 (24.7) | | 223 | |

**Table: 6 Multiple linear regression between demographic and clinical variables of the patients with knowledge, attitude, and practice scores**

| **Knowledge scores** | | **Unstandardized Coefficients** | | | | **Standardized Coefficients** | | **t** | | **p-value** |
| --- | --- | --- | --- | --- | --- | --- | --- | --- | --- | --- |
| B | | Std. Error | | Beta | |
| (Constant) | | 18.263 | | 3.874 | |  | | 4.714 | | .000 |
| Weight of the patient | | .085 | | .293 | | .010 | | .290 | | .772 |
| Age group | | -.633 | | .339 | | -.077 | | -1.867 | | .063 |
| Gender | | -.292 | | .717 | | -.015 | | -.407 | | .685 |
| Marital status | | -.897 | | .335 | | -.096 | | -2.682 | | .008 |
| Education Status | | 2.523 | | .240 | | .449 | | 10.515 | | 0<.001 |
| Occupation of patient | | -.700 | | .320 | | -.085 | | -2.185 | | .029 |
| Health insurance | | -2.498 | | .741 | | -.134 | | -3.373 | | .001 |
| Family history of the patient | | -.541 | | .606 | | -.033 | | -.892 | | .373 |
| Patient history | | 2.452 | | .366 | | .287 | | 6.700 | | 0<.001 |
| Blood sugar: FSL | | -1.139 | | .287 | | -.164 | | -3.975 | | 0<.001 |
| Blood sugar: RBS | | 1.703 | | .464 | | .164 | | 3.673 | | 0<.001 |
| Blood sugar: HbA1c | | -1.670 | | .943 | | -.072 | | -1.771 | | .077 |
| How often do you attend your diabetes clinic | | -1.606 | | .329 | | -.178 | | -4.878 | | 0<.001 |
| Physical activity | | 1.230 | | .429 | | .107 | | 2.870 | | .004 |
| **Attitude scores** | | | | | | | | | | |
| (Constant) | | 18.352 | | 5.010 | |  | | 3.663 | | .000 |
| Weight of the patient | | .220 | | .378 | | .022 | | .582 | | .561 |
| Age group | | -.601 | | .439 | | -.061 | | -1.371 | | .171 |
| Gender | | 2.398 | | .928 | | .104 | | 2.584 | | .010 |
| Marital status | | -2.778 | | .433 | | -.247 | | -6.420 | | 0<.001 |
| Education Status | | 2.630 | | .310 | | .387 | | 8.477 | | 0<.001 |
| Occupation of patient | | -.872 | | .414 | | -.088 | | -2.106 | | .036 |
| Health insurance | | -1.382 | | .958 | | -.061 | | -1.443 | | .150 |
| Family history of the patient | | .107 | | .784 | | .005 | | .136 | | .892 |
| Patient history | | 1.508 | | .473 | | .146 | | 3.186 | | .002 |
| Blood sugar: FSL | | .036 | | .371 | | .004 | | .096 | | .923 |
| Blood sugar: RBS | | .907 | | .600 | | .072 | | 1.513 | | .131 |
| Blood sugar: HbA1c | | -.896 | | 1.219 | | -.032 | | -.735 | | .463 |
| How often do you attend your diabetes clinic | | -.656 | | .426 | | -.060 | | -1.541 | | .124 |
| Physical activity | | 1.140 | | .554 | | .082 | | 2.058 | | .040 |
| **Practice scores** | | | | | | | | | | |
| (Constant) | 3.118 | | .842 | |  | | 3.703 | | 0<.001 | |
| Weight of the patient | .087 | | .064 | | .055 | | 1.375 | | .170 | |
| Age group | .503 | | .074 | | .320 | | 6.829 | | 0<.001 | |
| Gender | -.685 | | .156 | | -.187 | | -4.393 | | 0<.001 | |
| Marital status | -.216 | | .073 | | -.121 | | -2.964 | | .003 | |
| Education Status | .377 | | .052 | | .349 | | 7.233 | | 0<.001 | |
| Occupation of patient | -.210 | | .070 | | -.133 | | -3.024 | | .003 | |
| Health insurance | -.506 | | .161 | | -.141 | | -3.144 | | .002 | |
| Family history of the patient | .114 | | .132 | | .036 | | .867 | | .386 | |
| Patient history | .121 | | .080 | | .074 | | 1.527 | | .128 | |
| Blood sugar: FSL | -.170 | | .062 | | -.127 | | -2.726 | | .007 | |
| Blood sugar: RBS | .122 | | .101 | | .061 | | 1.214 | | .225 | |
| Blood sugar: HbA1c | -.259 | | .205 | | -.058 | | -1.262 | | .207 | |
| How often do you attend your diabetes clinic | -.146 | | .072 | | -.085 | | -2.045 | | .041 | |
| Physical activity | .053 | | .093 | | .024 | | .571 | | .568 | |
